# Supplementary material for: Unique Microbial Diversity and Metabolic Pathway Features of Fermented Vegetables From Hainan, China
Source: PubMed Central journal article supplement (PMC5845746; doi:10.3389/fmicb.2018.00399), 2018-03-06
Supplement: Presentation1.pdf [file Presentation1.pdf]

*Supplementary Material*

**Unique features of microbial diversity and metabolic pathways in  
fermented vegetables in Hainan, China**

**Qiannan Peng<sup>1#</sup>, Shuaiming Jiang<sup>1#</sup>, Jieling Chen<sup>1</sup>, Chenchen Ma<sup>1</sup>, Dongxue Huo<sup>1</sup>, Yuyu Shao<sup>2\*</sup>,  
Jiachao Zhang<sup>1,3\*</sup>**

**\* Correspondence:**

Corresponding Author:

Jiachao Zhang, College of Food Science and Technology, Hainan University, Haikou 570228, P. R. China

email: [zhjch321123@163.com](mailto:zhjch321123@163.com)

Yuyu Shao, College of Food Engineering and Nutritional Science, Shaanxi Normal University, Xi'an 710119, Shaanxi, P. R. China

email: [icheesemaking@yahoo.com](mailto:icheesemaking@yahoo.com)

# 1 Supplementary Figures and Tables

## 1.1 Supplementary Table

| Region |                | Type      | Region |            | Type      |
|--------|----------------|-----------|--------|------------|-----------|
| ES     | Wanning        | FCC (n=3) | WS     | Lingao     | FCC (n=1) |
|        |                | FGB (n=2) |        |            | FBS (n=3) |
|        | Wenchang       | FCC (n=4) |        |            | FW (n=1)  |
|        |                | FGB (n=1) |        | FBS (n=1)  |           |
| MS     | Qiongzho<br>ng | FGB (n=4) |        | Changjiang | FCC (n=2) |
|        |                | FW (n=1)  |        |            | FW (n=2)  |
|        | Wuzhisha<br>n  | FCC (n=1) |        | Baisha     | FBS (n=4) |
|        |                | FGB (n=4) |        |            | FW (n=1)  |
|        |                | FW (n=1)  |        |            |           |

**Supplementary Table S1** The regions and types of fermented vegetable samples

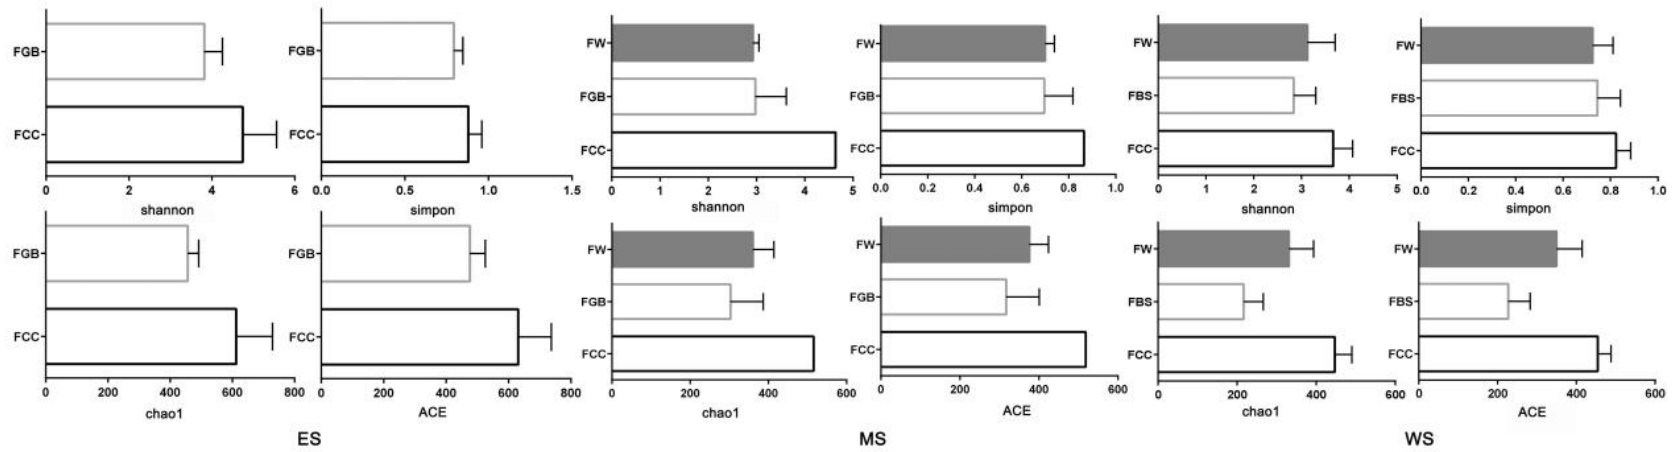

**Supplementary Figure S1** Differences in microbial alpha diversity among different types of fermented vegetables in the same region

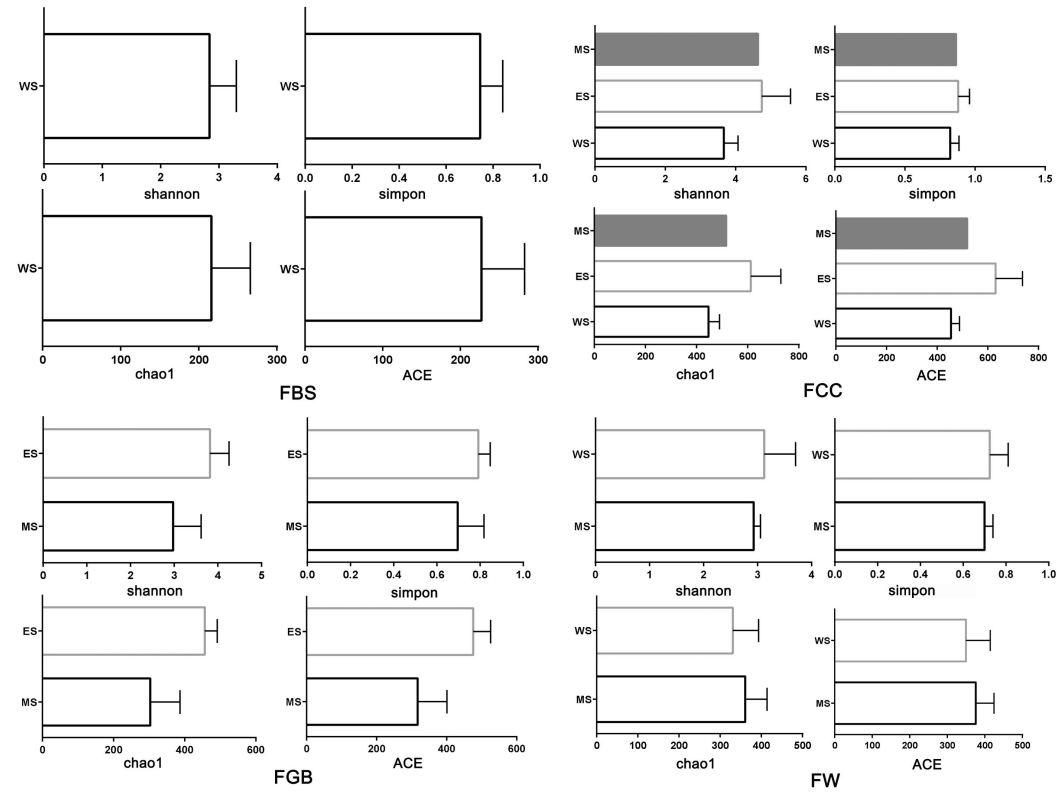

**Supplementary Figure S2** Differences in microbial alpha diversity among the same type of fermented vegetables in different regions

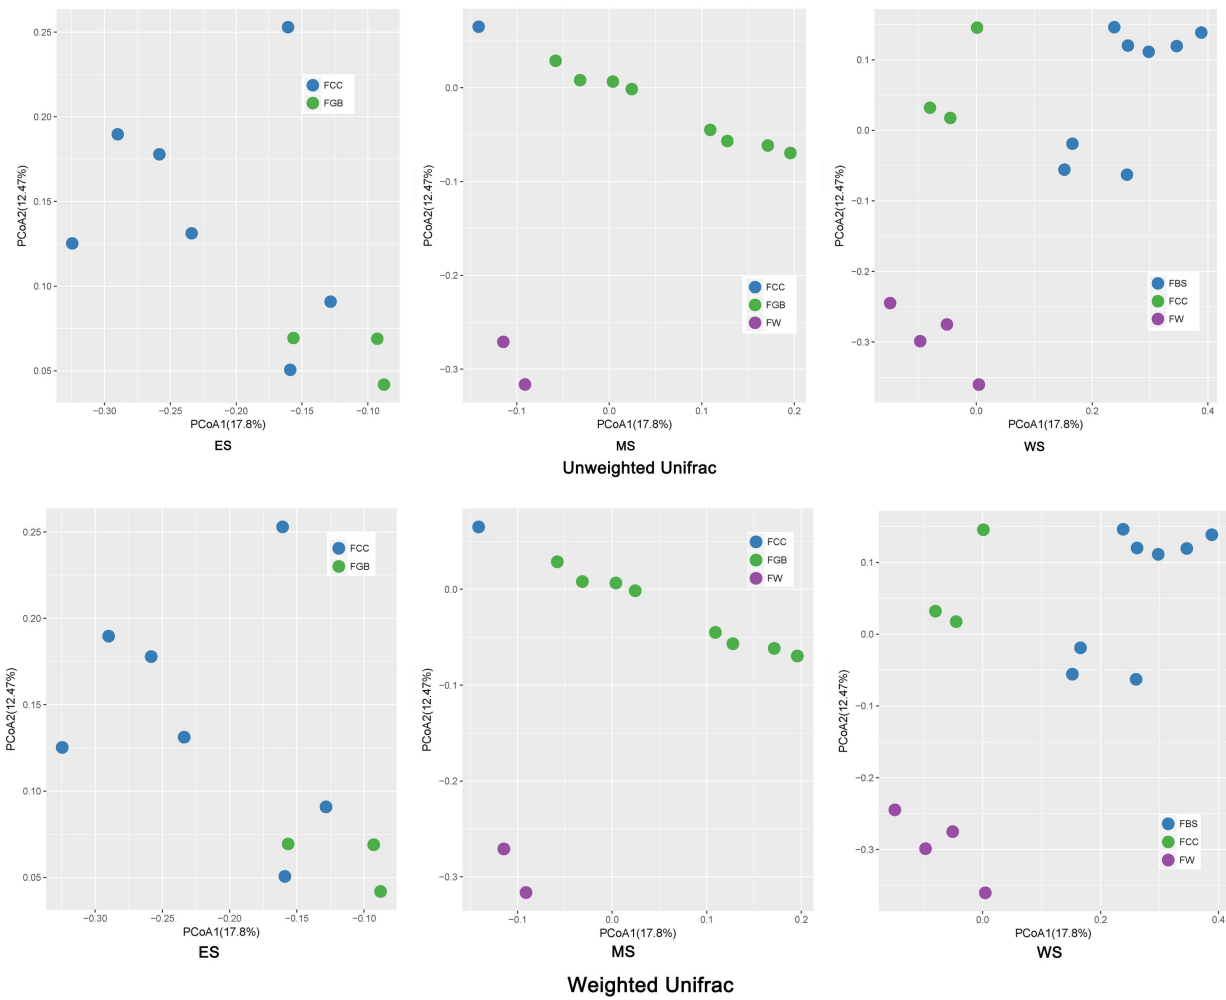

**Supplementary Figure S3** Microbial beta diversity among different types of fermented vegetables in the same region

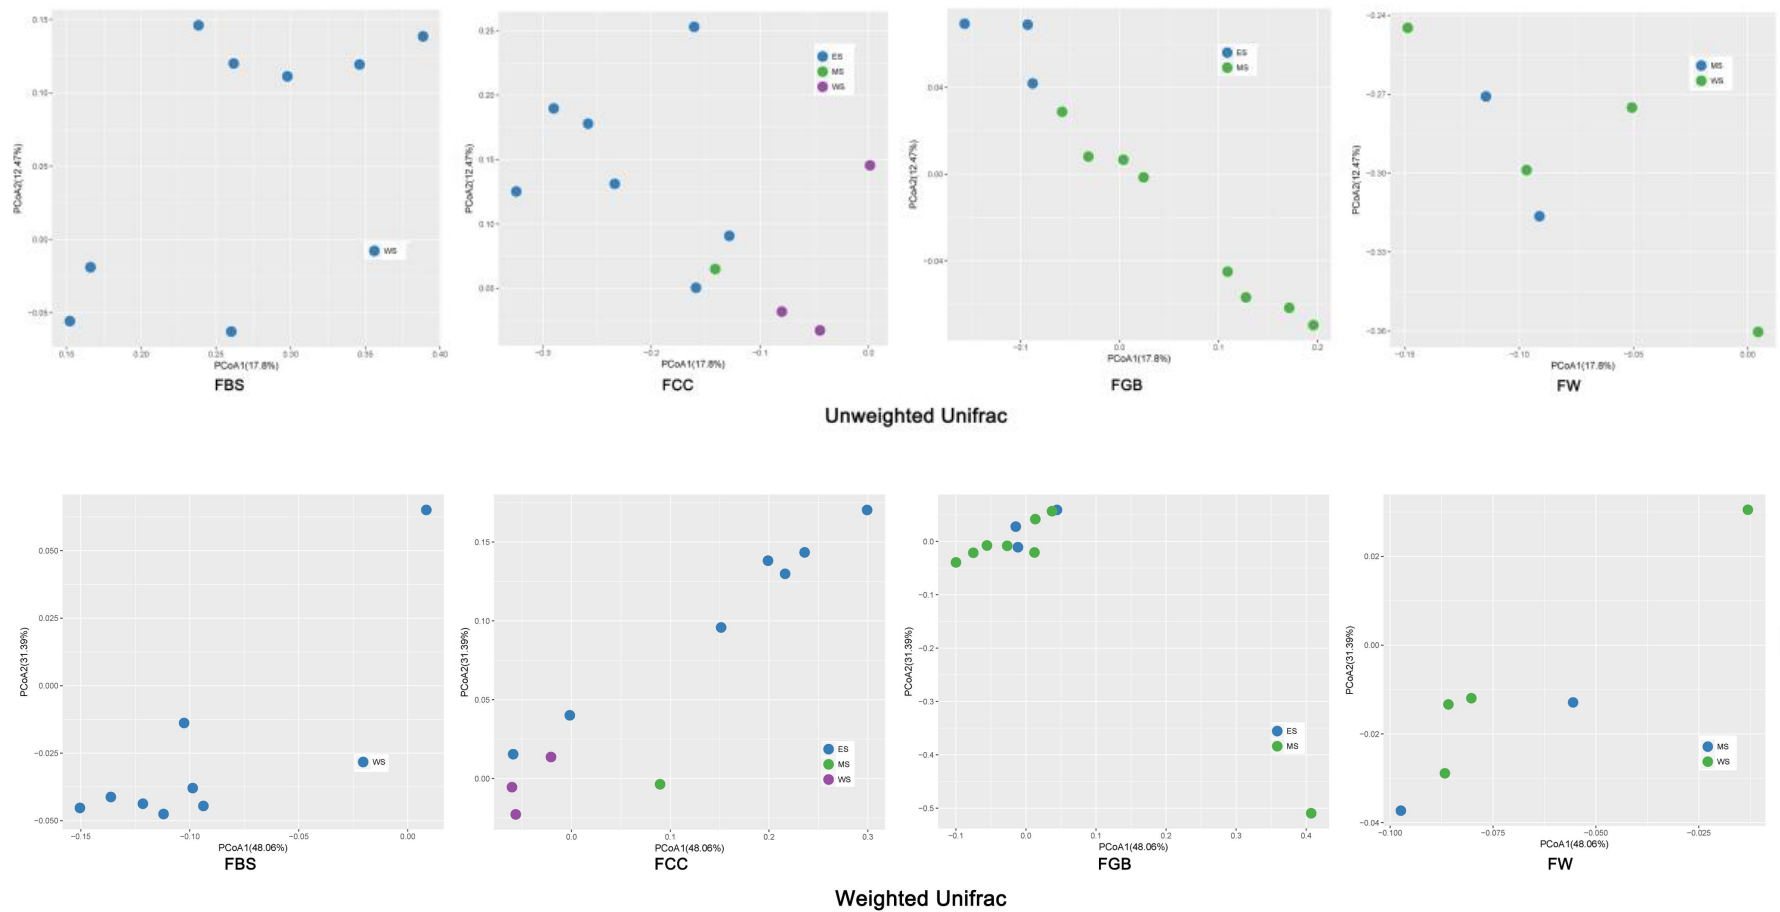

Supplementary Figure S4 Microbial beta diversity among the same type of fermented vegetables in different regions

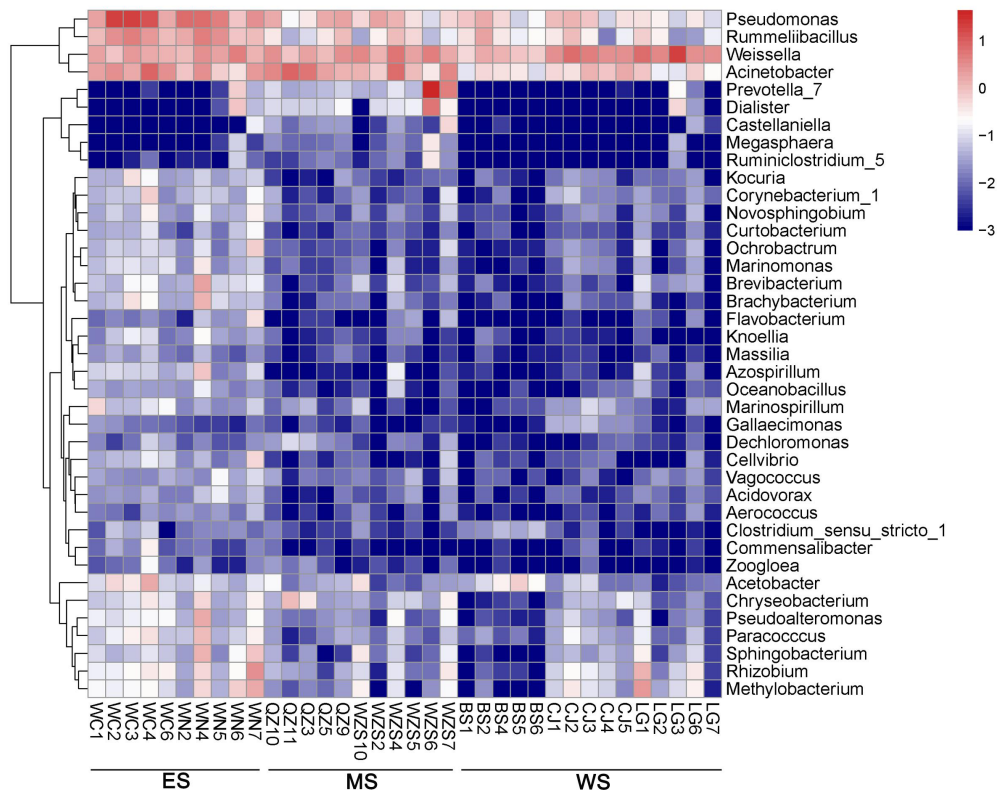

Supplementary Figure S5 Microbial differences at the genus level in different regions

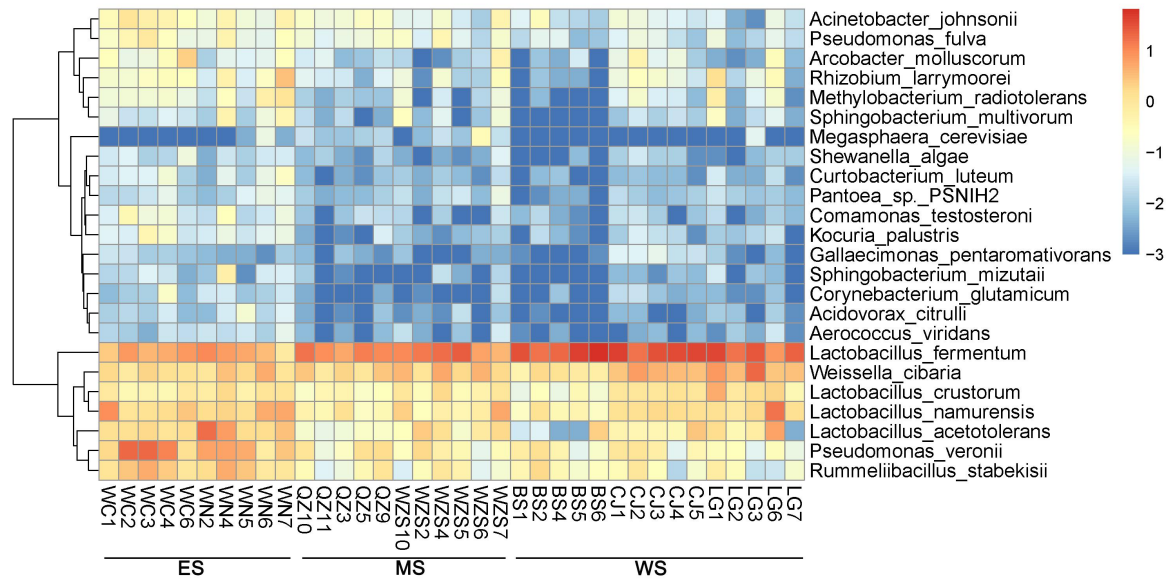

Supplementary Figure S6 Microbial differences at the region level in different regions
